# Supplementary material for: Poly-Lactic Acid-Bagasse Based Bio-Composite for Additive Manufacturing
Source: MDPI journal article supplement (doi:10.3390/polym15214323), 2023-11-04
Supplement: s1 [file s1]

Supplementary material

# Poly-Lactic Acid–Bagasse-Based Bio-Composite for Additive Manufacturing

Silvia Carichino <sup>1</sup>, Dino Scanferla <sup>1</sup>, Daniela Fico <sup>1</sup>, Daniela Rizzo <sup>2</sup>, Francesca Ferrari <sup>1</sup>, María Jorda-Reolid <sup>3</sup>, Asunción Martínez-García <sup>3</sup> and Carola Esposito Corcione <sup>1,\*</sup>

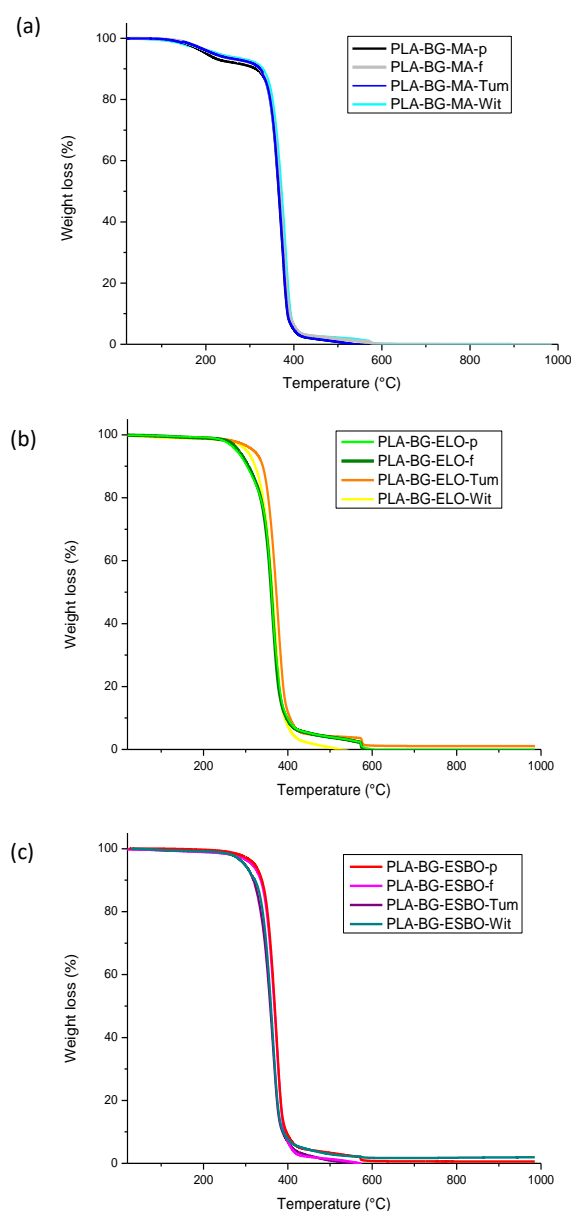

**Figure S1.** TGA curves of PLA–BG–MA in pellet form, filament form, and printed by Tumaker NX Pro Pellets, and by BQ Witbox 2 (a), PLA–BG–ELO in pellet form, filament form, and printed by Tumaker NX Pro Pellets, and by BQ Witbox 2 (b), PLA–BG–ESBO in pellet form, filament form, and printed by Tumaker NX Pro Pellets, and by BQ Witbox 2 (c).
